# Supplementary material for: Improving near-room-temperature thermoelectrics: the role of Ag2Se doping and Bi/Sb ratio in (Bi,Sb)2Te3
Source: Royal Society of Chemistry journal article supplement (doi:10.1039/d4ta08618j), 2025-01-01
Supplement: d4ta08618j1.pdf [file d4ta08618j1.pdf]

## Supporting Information

### Improving Near-Room-Temperature Thermoelectrics: The Role of Ag<sub>2</sub>Se Doping and Bi/Sb Ratio in (Bi, Sb)<sub>2</sub>Te<sub>3</sub>

Wenxin Ou,<sup>a#</sup> Ruiheng Li,<sup>a#</sup> Chunliang Zhou,<sup>b#</sup> Yuange Luo,<sup>a</sup> Yin Xie,<sup>a</sup> and Ran Ang<sup>a,c\*</sup>

<sup>a</sup>Key Laboratory of Radiation Physics and Technology, Ministry of Education, Institute of Nuclear Science and  
Technology, Sichuan University, Chengdu 610064, China

<sup>b</sup> Yantai Research Institute, Harbin Engineering University, Yantai 264006, China

<sup>c</sup>Institute of New Energy and Low-Carbon Technology, Sichuan University, Chengdu 610065, China

#Wenxin Ou, Ruiheng Li, and Chunliang Zhou contributed equally to this work.

\*Corresponding author and Email: [rang@scu.edu.cn](mailto:rang@scu.edu.cn)

## The single parabolic (SPB) model<sup>1</sup>

Within the SPB model, the transport parameters are expressed as follows:

$$S = \frac{k_B}{e} \left[ \frac{2F_1}{F_0} - (\eta - \Delta) \right] \quad (S1)$$

Where  $k_B$ ,  $e$ ,  $F_0$  and  $F_1$ ,  $\eta$ , and  $\Delta$  is respectively the Boltzmann constant, electron charge, Fermi integrals, the reduced chemical potential and the reduced energy difference between the bottoms of the two bands,

$$\Delta = E_V/k_B T \quad (S2)$$

The carrier concentration  $n_H$ :

$$n_H = 4\pi \left( \frac{2m^* k_B T}{h^2} \right)^{3/2} F_{1/2}(\eta - \Delta) \quad (S3)$$

Where  $m^*$  is the density of state effective mass taking into account band degeneracy,  $h$  is the Plank's constant,  $T$  is the absolute temperature. The mobility  $\mu_H$ :

$$\mu_H = \mu_0 \frac{F_{-1/2}}{2F_0} = \frac{\tau_0 e F_{-1/2}}{m^* 2F_0} \quad (S4)$$

Where  $\tau_0$  is the relaxation time, which is closely related to the energy in the case of acoustic phonon scattering:<sup>2</sup>

$$\tau_0 = \frac{h^4 C_1}{8\sqrt{2}\pi^3 E_{def}^2 m^* k T^{3/2}} \quad (S5)$$

Where  $C_1$  is a parameter determined by the combination of the elastic constant,<sup>3</sup> and  $E_{def}$  is a combination of deformation potentials for multivalley systems. The Hall factor  $A$  is given by:

$$A = \frac{3}{2} F_{1/2}(\eta) \frac{F_{-1/2}}{2F_0^2} \quad (S6)$$

The Hall factor reflects the energy scattering mechanism and the anisotropy of the energy band. In the SPB model, anisotropy does not need to be considered. The Lorenz number  $L$  is defined as:

$$L = \frac{k_B^2 3F_0 F_2 - 4F_1^2}{e^2 F_0^2} \quad (S7)$$

And the integral  $F_j$  above is defined by:

$$F_j(\eta) = \int_0^\infty \frac{\xi^j d\xi}{1 + e^{(\xi - \eta)}} \quad (S8)$$

## Calculation of lattice thermal conductivity

The total relaxation time  $\tau_{tot}$  can be calculated using Matthiessen's rule:<sup>4</sup>

$$\tau_{tot}^{-1} = \tau_{UN}^{-1} + \tau_{PD}^{-1} + \tau_{GB}^{-1} \quad (S9)$$

Where  $\tau_{UN}$ ,  $\tau_{PD}$  and  $\tau_{GB}$  correspond to the relaxation times for Umklapp-process scattering, point defect scattering, grain boundary scattering, and stacking fault scattering, respectively. The relevant phonon relaxation times are given by:

Umklapp phonon-phonon scattering:

$$\tau_{UN}^{-1} = A_N \frac{2}{(6\pi^2)^{\frac{1}{3}}} \frac{k_B \bar{V}^{\frac{1}{3}} \gamma^2 \omega^2 T}{\bar{M} v^3} \quad (\text{S10})$$

Point defect phonon scattering:

$$\tau_{PD}^{-1} = \frac{V \omega^4}{4\pi v^3} \Gamma \quad (\text{S11})$$

Grain boundary phonon scattering:

$$\tau_{GB}^{-1} = \frac{v}{d} \quad (\text{S12})$$

Where  $\gamma$  is the Grüneisen parameter,  $\bar{M}$  is the average mass,  $m^*$  is the effective mass of charger carrier,  $\rho$  is the sample density,  $\bar{V}$  is the average atomic volume,  $\Gamma$  is the point defect scattering parameter (which is determined by the mass difference), and  $d$  is the grain size. The Umklapp phonon–phonon scattering strength coefficient  $A_N$  is fit to the experimental data of the in-plane  $\kappa_l$  of fully dense samples.

## Calculation of bipolar thermal conductivity

In *n*-type Bi<sub>2</sub>Te<sub>3</sub>-based materials around 303 K, acoustic phonon scattering is the dominant mechanism for carrier scattering. As a result, the electron mobility ( $\mu_e$ ) follows the relationship  $\mu_e \sim T^{-3/2}$ . As shown in Figure S6b, the calculated electron concentration ( $n_e$ ) for all samples exhibits an empirical dependence of  $n_e \sim T^{7.5}$ . Therefore, the qualitative relationship between  $\mu_e$  and  $n$  is derived as:  $\mu_e \approx B n_e^{-1/5}$ , where  $B$  is a temperature-independent constant for the fixed component (as shown in Table S1).

## Supplementary details

**Figure S1.** (a,b) Grain size distribution of  $\text{Bi}_{0.3}\text{Sb}_{1.7}\text{Te}_3$ - $x$  mol%  $\text{Ag}_2\text{Se}$  ( $x = 0, 0.1$ ).

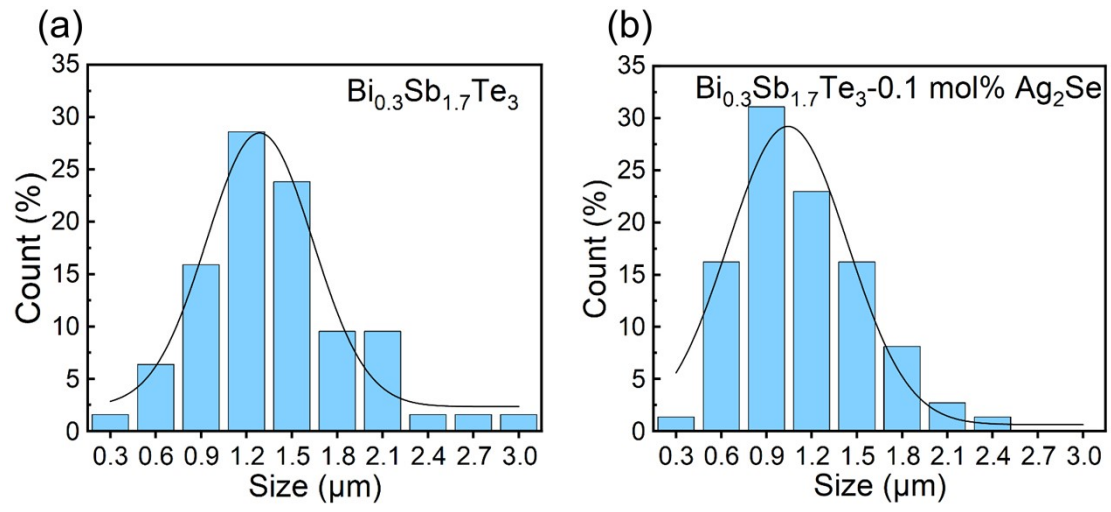

**Figure S2.** The Pisarenko plot of  $n_H$ - $S$  for  $\text{Bi}_{0.3}\text{Sb}_{1.7}\text{Te}_{3-x}$  mol%  $\text{Ag}_2\text{Se}$  ( $x = 0, 0.05, 0.075, 0.1, 0.125$ ) and  $\text{Bi}_y\text{Sb}_{2-y}\text{Te}_{3-0.1}$  mol%  $\text{Ag}_2\text{Se}$  ( $y = 0.3, 0.4, 0.5, 0.6$ ) samples at 303 K.

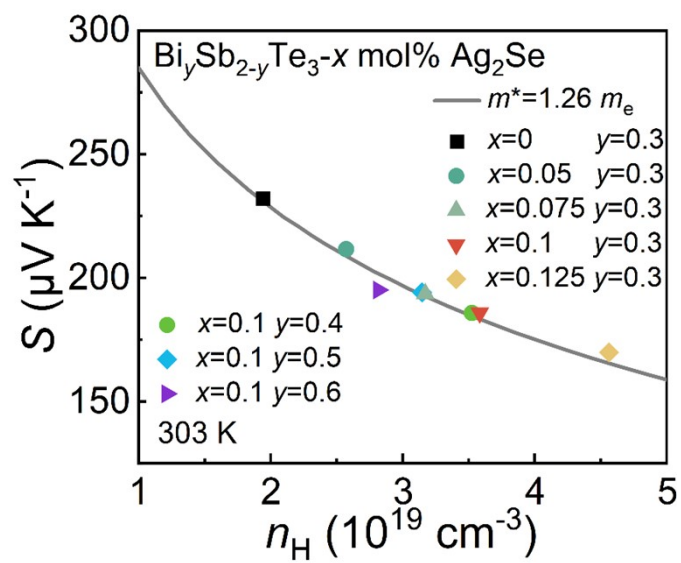

**Figure S3.** (a) Electrical thermal conductivity ( $\kappa_e$ ) of  $\text{Bi}_{0.3}\text{Sb}_{1.7}\text{Te}_{3-x}$  mol%  $\text{Ag}_2\text{Se}$  and (b)  $\kappa_e$  of  $\text{Bi}_y\text{Sb}_{2-y}\text{Te}_3$ -0.1 mol%  $\text{Ag}_2\text{Se}$  samples.

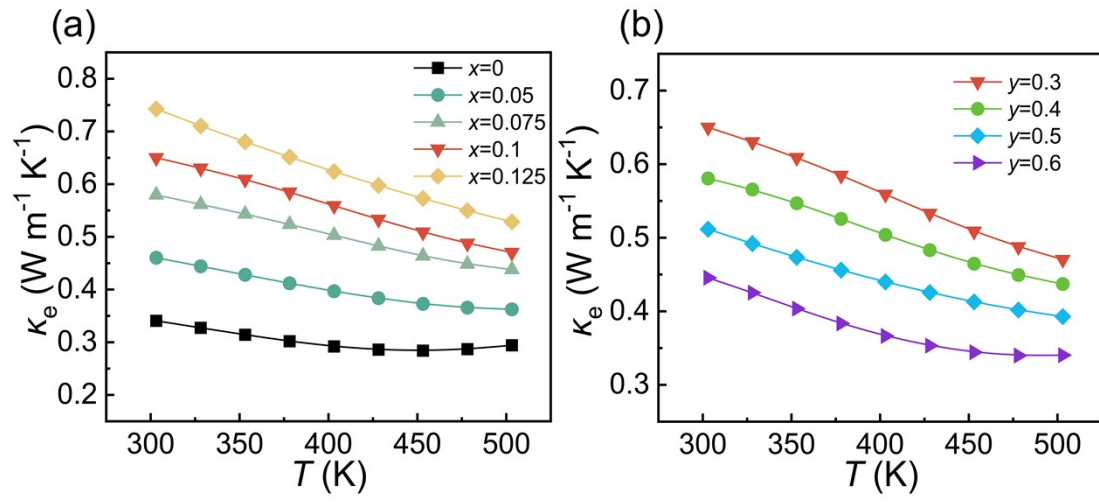

**Figure S4.** Temperature dependence of the calculated (a) carrier concentration ( $n_H$ ) and (b) electron concentration ( $n_e$ ) for the  $\text{Bi}_{0.3}\text{Sb}_{1.7}\text{Te}_{3-x}$  mol%  $\text{Ag}_2\text{Se}$  samples.

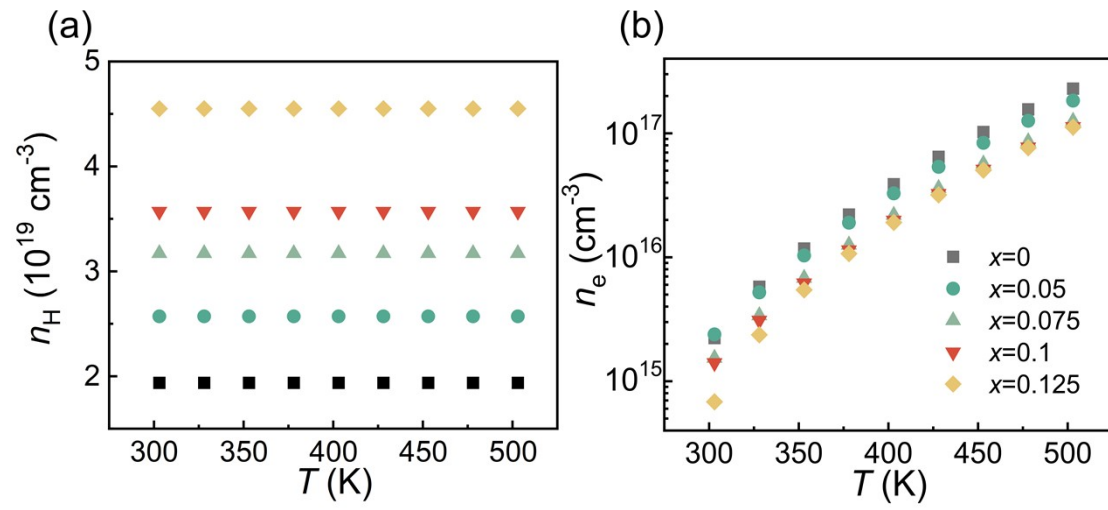

**Figure S5.** Variation of carrier concentration ( $n_H$ ) and mobility ( $\mu_H$ ) with  $y$  content in  $\text{Bi}_y\text{Sb}_{2-y}\text{Te}_3$ -0.1 mol%  $\text{Ag}_2\text{Se}$  at 303 K.

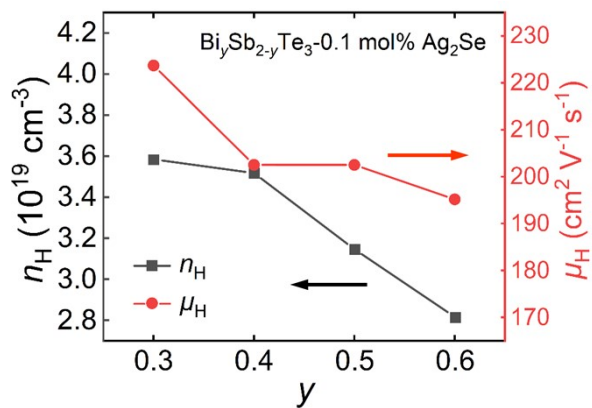



**Figure S6.** Temperature-dependent (a) electrical conductivity ( $\sigma$ ); (b) Seebeck coefficient ( $S$ ); (c) power factor ( $PF$ ); (d) total thermal conductivity ( $\kappa_t$ ); (e) lattice plus bipolar thermal conductivity ( $\kappa_{lat} + \kappa_b$ ); (f) figure of merit ( $zT$ ) for  $\text{Bi}_{0.4}\text{Sb}_{1.6}\text{Te}_3$ -0.1 mol% $\text{Ag}_2\text{Se}$  sample tested perpendicular (in-plane) and parallel (out-of-plane) to the uniaxial high-voltage direction.

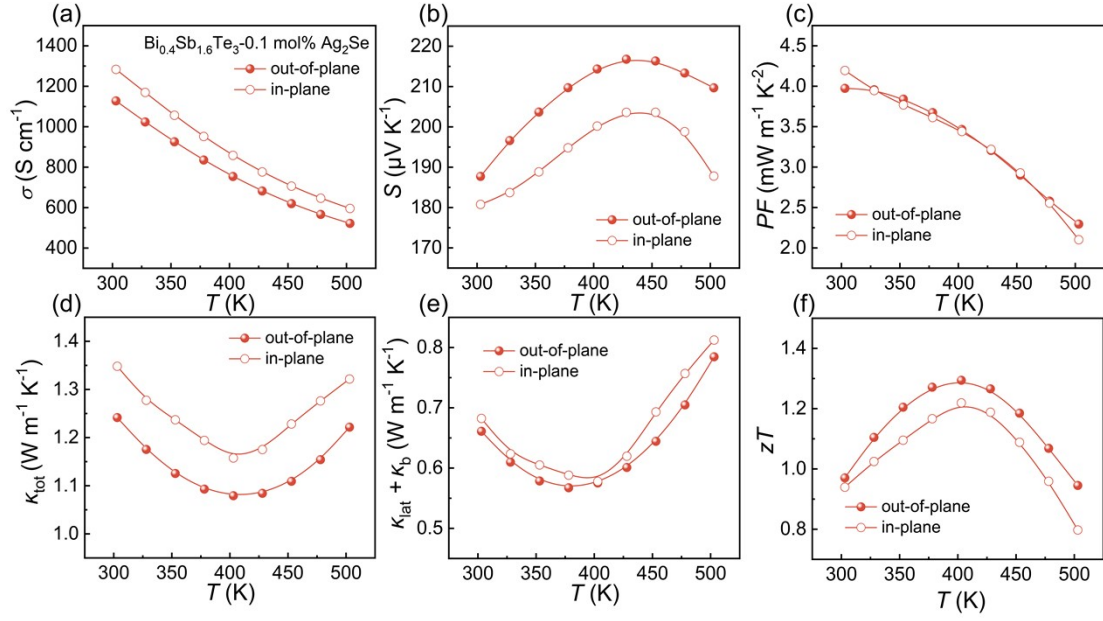

**Figure S7.** TE devices made of commercially available  $n$ -type  $\text{Bi}_2\text{Te}_{2.7}\text{Se}_{0.3}$  and  $p$ -type  $\text{Bi}_{0.5}\text{Sb}_{1.5}\text{Te}_3$  (a) Output voltage ( $U$ ); (b) Output power ( $P$ ); (c) Heat flow ( $Q$ ); (d) Conversion efficiency ( $\eta$ ) as a function of current ( $I$ ).

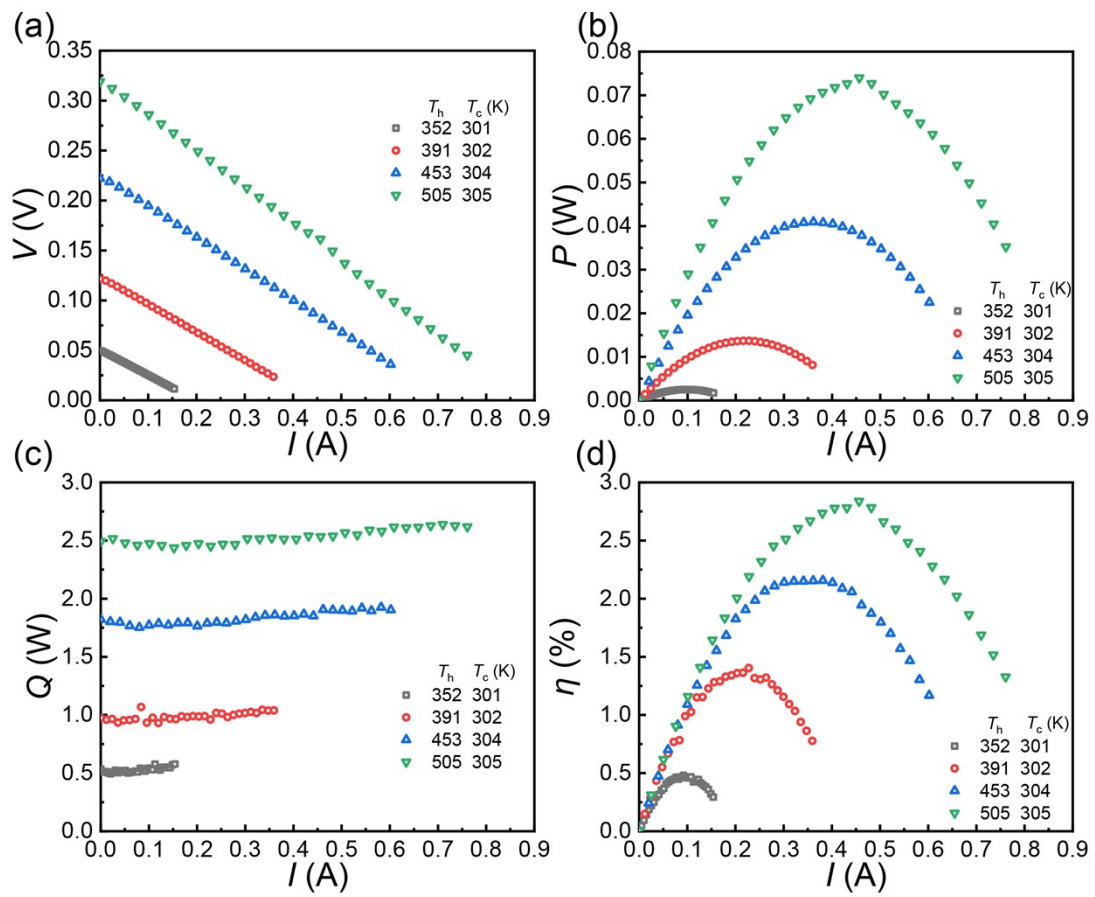

## Supplementary Tables

**Table S1.** Calculated parameters  $A$  and  $B$  using the minor and major carrier concentrations at 303 K.

| $\text{Bi}_{0.3}\text{Sb}_{1.7}\text{Te}_{3-x}$ mol% $\text{Ag}_2\text{Se}$ | $x = 0$ | $x = 0.05$ | $x = 0.075$ | $x = 0.1$ | $x = 0.125$ |
|-----------------------------------------------------------------------------|---------|------------|-------------|-----------|-------------|
| $A(10^{30}\text{cm}^{-6})$                                                  | 3.24    | 2.72       | 2.49        | 2.45      | 2.33        |
| $B$                                                                         | 1.58    | 1.37       | 1.68        | 1.55      | 1.22        |

**Table S2.** Parameters used for the calculation of lattice thermal conductivity.

| Parameters     | Description                                                                  | Values                                | Ref.   |
|----------------|------------------------------------------------------------------------------|---------------------------------------|--------|
| $\theta_D$     | Debye temperature                                                            | 124                                   | 5      |
| $\gamma$       | Grüneisen parameter                                                          | 2.3                                   | 5      |
| $r$            | Poisson's ratio                                                              | 0.25                                  | 5      |
| $v_L$          | Longitudinal sound velocity                                                  | 2988 m·s <sup>-1</sup>                | 5      |
| $v_T$          | Transverse sound velocity                                                    | 1721 m·s <sup>-1</sup>                | 5      |
| $\Gamma$       | Point defect scattering parameter                                            | 0.175                                 | 5      |
| $v$            | Average speed of sound                                                       | 2147 m·s <sup>-1</sup>                | 6      |
| $V$            | Average atomic volume of Bi <sub>0.3</sub> Sb <sub>1.7</sub> Te <sub>3</sub> | 3.13×10 <sup>-29</sup> m <sup>3</sup> | 6      |
| $V_{Bi_2Te_3}$ | Atomic volume of Bi <sub>2</sub> Te <sub>3</sub>                             | 3.40×10 <sup>-29</sup> m <sup>3</sup> | 6      |
| $V_{Sb_2Te_3}$ | Atomic volume of Sb <sub>2</sub> Te <sub>3</sub>                             | 3.31×10 <sup>-29</sup> m <sup>3</sup> | 6      |
| $M_{Bi_2Te_3}$ | Average atomic mass of Bi <sub>2</sub> Te <sub>3</sub>                       | 2.79×10 <sup>-25</sup> kg             | 7      |
| $M_{Sb_2Te_3}$ | Average atomic mass of Sb <sub>2</sub> Te <sub>3</sub>                       | 2.07×10 <sup>-25</sup> kg             | 7      |
| $A_N$          | Comprehensive coefficient between<br>Umklapp and Normal processes            | 2.3                                   | fitted |
| $M$            | Average atomic mass of Bi <sub>0.3</sub> Sb <sub>1.7</sub> Te <sub>3</sub>   | 2.2×10 <sup>-25</sup> kg              | fitted |
| $d$            | Grain size                                                                   | 1.2                                   | Exp.   |

**Table S3.** Relevant parameters of commercially available *n*-type Bi<sub>2</sub>Te<sub>2.7</sub>Se<sub>0.3</sub> and *p*-type Bi<sub>0.5</sub>Sb<sub>1.5</sub>Te<sub>3</sub>.

| Project               | Technical requirement         | Unit                              | Remark                |
|-----------------------|-------------------------------|-----------------------------------|-----------------------|
| Product model         | <i>n</i> -type crystal rod    | /                                 |                       |
| Production technology | zone melting pulling crystals | /                                 |                       |
| Seebeck coefficient   | ≤-200                         | μV K <sup>-1</sup>                | Test temperature 300K |
| Electric conductivity | 1000±5%                       | S cm <sup>-1</sup>                | Test temperature 300K |
| Thermal conductivity  | 1.42±5%                       | W m <sup>-1</sup> K <sup>-1</sup> | Test temperature 300K |
| $zT$                  | 0.86                          | /                                 | Test temperature 300K |
| Compressive strength  | 35±5                          | MPa                               |                       |
| Product model         | <i>p</i> -type-SPS900         | /                                 |                       |
| Production technology | powder metallurgy             | /                                 |                       |
| Seebeck coefficient   | ≥200                          | μV K <sup>-1</sup>                | Test temperature 300K |
| Electric conductivity | 1000±10%                      | S cm <sup>-1</sup>                | Test temperature 300K |
| Thermal conductivity  | 1.35±5%                       | W m <sup>-1</sup> K <sup>-1</sup> | Test temperature 300K |
| $zT$                  | 0.95                          | /                                 | Test temperature 300K |
| Compressive strength  | 65±5                          | MPa                               |                       |

## Notes and references

- 1 M. Zhou, Z. M. Gibbs, H. Wang, Y. Han, C. Xin, L. Li and G. J. Snyder, *Phys. Chem. Chem. Phys.*, 2014, **16**, 20741–20748.
- 2 Y. Xiao, H. Wu, W. Li, M. Yin, Y. Pei, Y. Zhang, L. Fu, Y. Chen, S. J. Pennycook, L. Huang, J. He and L.-D. Zhao, *J. Am. Chem. Soc.*, 2017, **139**, 18732–18738.
- 3 C. Herring and E. Vogt, *Phys. Rev.*, 1956, **101**, 944–961.
- 4 T. J. Zhu, C. G. Fu, H. H. Xie, Y. T. Liu, B. Feng, J. Xie and X. B. Zhao, *Epl-Europhys Lett.*, 2013, **104**, 46003.
- 5 H.-L. Zhuang, H. Hu, J. Pei, B. Su, J.-W. Li, Y. Jiang, Z. Han and J.-F. Li, *Energy Environ. Sci.*, 2022, **15**, 2039–2048.
- 6 Q. Zhang, M. Yuan, K. Pang, Y. Zhang, R. Wang, X. Tan, G. Wu, H. Hu, J. Wu, P. Sun, G.-Q. Liu and J. Jiang, *Adv. Mater.*, 2023, **35**, 2300338.
- 7 S. I. Kim, K. H. Lee, H. A. Mun, H. S. Kim, S. W. Hwang, J. W. Roh, D. J. Yang, W. H. Shin, X. S. Li, Y. H. Lee, G. J. Snyder and S. W. Kim, *Science*, 2015, **348**, 109-114.
